# Supplementary material for: Pseudoautosomal Region 1 Length Polymorphism in the Human Population
Source: PubMed Central journal article supplement (PMC4222609; doi:10.1371/journal.pgen.1004578), 2014-11-06

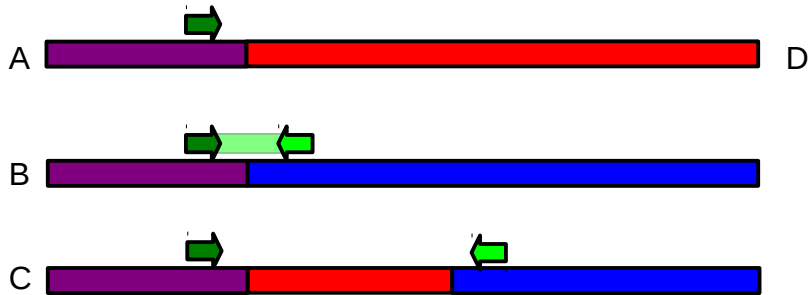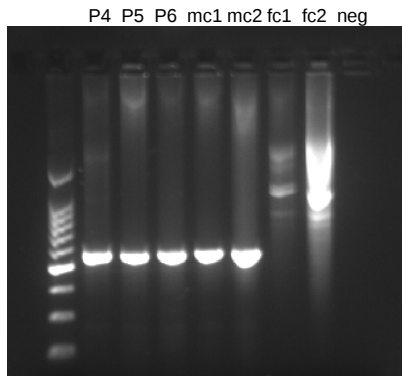

Supplement: pgen.1004578.s001.pdf [file pgen.1004578.s001.pdf]
