# Supplementary material for: Pseudoautosomal Region 1 Length Polymorphism in the Human Population
Source: PubMed Central journal article supplement (PMC4222609; doi:10.1371/journal.pgen.1004578), 2014-11-06
Supplement: pgen.1004578.s003.pdf [file pgen.1004578.s003.pdf]

| <b>Family</b> | <b>Sample</b> | <b>Clinical description</b>                                                                                                       |
|---------------|---------------|-----------------------------------------------------------------------------------------------------------------------------------|
| 1             | P1            | moderate ID, autism, macrocephaly                                                                                                 |
| 1             | F1            | no info                                                                                                                           |
| 1             | M1            | no info                                                                                                                           |
| 1             | B1            | autism spectrum disorder (ASD), macrocephaly                                                                                      |
| 2             | P2            | subfertility                                                                                                                      |
| 2             | F2            | no info                                                                                                                           |
| 2             | M2            | no info                                                                                                                           |
| 3             | P3            | ASD                                                                                                                               |
| 3             | F3            | no info                                                                                                                           |
| 4             | P4            | bilateral coloboma, strabismus, psychomotor instability, speech delay, attention deficit disorder                                 |
| 4             | F4            | no info                                                                                                                           |
| 4             | M4            | no info                                                                                                                           |
| 5             | P5            | ID, microcephaly, seizures (15q13.3 microdeletion syndrome)                                                                       |
| 5             | F5            | no info                                                                                                                           |
| 5             | M5            | school drop-out (carrier of 15q13.3 microdeletion)                                                                                |
| 6             | P6            | developmental delay, ASD, arachnoid cyst, macrocephaly                                                                            |
| 6             | F6            | no info                                                                                                                           |
| 6             | M6            | no info                                                                                                                           |
|               | P7            | ID                                                                                                                                |
|               | P8            | ID and behavioural abnormality (agression)                                                                                        |
|               | P9            | ID, ASD                                                                                                                           |
|               | P10           | moderate ID, behavioural abnormality (verbal aggression), psychosis, kyphosis                                                     |
|               | P11           | ID, facial dysmorphism (small palpebral fissures, long philtrum, retrognathia)                                                    |
|               | P12           | ASD and facial dysmorphism (epicanthal folds, small palpebral fissures, thin upper lip, flat long philtrum, micrognathia)         |
|               | P13           | developmental delay, ASD, hypotonia, seizures, nystagmus                                                                          |
|               | P14           | developmental delay, failure to thrive, facial dysmorphism                                                                        |
|               | P15           | mild developmental delay, hypotonia, epicanthal folds and short stature                                                           |
| Deletion      | P_del         | behavioral abnormality, mild ID, dysmorphism (straight eyebrows, broad neck, low occipital hairline, concave nails) and scoliosis |
|               | F_del         | unaffected                                                                                                                        |
|               | M_del         | unaffected                                                                                                                        |
|               | S_del         | unaffected                                                                                                                        |
