# Supplementary material for: Pseudoautosomal Region 1 Length Polymorphism in the Human Population
Source: PubMed Central journal article supplement (PMC4222609; doi:10.1371/journal.pgen.1004578), 2014-11-06
Supplement: pgen.1004578.s004.pdf [file pgen.1004578.s004.pdf]

### Primers Used in This Study

| Forward primer                      | Reverse Primer                          | Target                                                         |
|-------------------------------------|-----------------------------------------|----------------------------------------------------------------|
| GGGGTCCCGAGATTTATGTT                | TCTCGATCTCCTGACCTCGT                    | Supplemental Figure 1                                          |
| TGGCAATGTTACTGGAGACG                | TTCTTCATTCTTCATTTTCATCCA                | Figure 2 A Green (Sanger Junction)                             |
| BARCODE(1-24)+GCCCATCCTCAGAACTCACT  | BARCODE(1-24)+AGGCATCCTCGAAAACAAGC      | Figure 2 A Red (PacBio duplicated region)                      |
| BARCODE(21-24)+ACATGGTAGACGCCTGTTCA | BARCODE(21-24)+TTCTTCATTCTTCATTTTCATCCA | Figure 2A Grey (PacBio Junction -samples P10,P11,P12,P13)      |
| BARCODE(1-20)+AAATGAACGCTAAGCCCCAC  | BARCODE(1-20)+TTCTTCATTCTTCATTTTCATCCA  | Figure 2A Grey (PacBio Junction -other samples than above row) |
| AGACCATCCTGGCTAACACG                | TCCAACCCCTGTTTAGCATC                    | Figure 3 B (Reciprocal deletion)                               |

BARCODES are PacBio recommended barcodes 1-24 with padding
